# Supplementary material
Source: publisher figshare collection journal article supplement (https://acs.figshare.com/ndownloader/files/21843798)
Supplement: Supplementary file 1 [file 21843798]

## *Supporting Information*

### **In situ growth of high quality crystals for organic electronics**

Ilya Bronshtein,<sup>†</sup> Gregory Leitus,<sup>‡</sup> and Boris Rybtchinski<sup>†\*</sup>

<sup>†</sup> Department of Organic Chemistry, Weizmann Institute of Science, Rehovot 7610001, Israel.

<sup>‡</sup> Department of Chemical Research Support, Weizmann Institute of Science, Rehovot 7610001, Israel.

\*E-mail: Boris.Rybtchinski@weizmann.ac.il

## CONTENT

**Scheme S1.** Illustration of RTP.

**Figure S1.** Powder X-ray diffractograms of CuPc thin films after RTP for 0-2700 s.

**Figure S2.** Crystal structure of the  $\beta$ -form CuPc.

**Figure S3.** XRD showing preferred orientation of  $\beta$  form CuPc crystals.

**Figure S4.** SEM images of 150-nm CuPc thin films after RTP treatment.

**Figure S5.** SEM images of 70 nm CuPc thin films after RTP without Ar and under low Ar flow (1 sccm).

**Figure S6.**  $\beta$  form CuPc crystals obtained after RTP of 70-nm thick film deposited at 25 °C.

**Figure S7.** SEM images of 400-nm thick CuPc film before and after RTP treatment.

**Figure S8.** Transfer and output characteristics of the  $\beta$  form CuPc crystals.

**Figure S9.** Histogram of the mobilities ( $\beta$  form CuPc crystals).

**Figure S10.** Changes of magnetic susceptibility of  $\beta$ -form CuPc powder obtained by RTP treatment under illumination.

**Figure S11:** Normalized magnetic susceptibility of  $\beta$ -form CuPc powder.

**Figure S12.** Powder X-ray diffractograms recorded from rubrene films before and after RTP treatment.

**Table S1.** Effect of RTP and PVD parameters on the morphology of CuPc films.

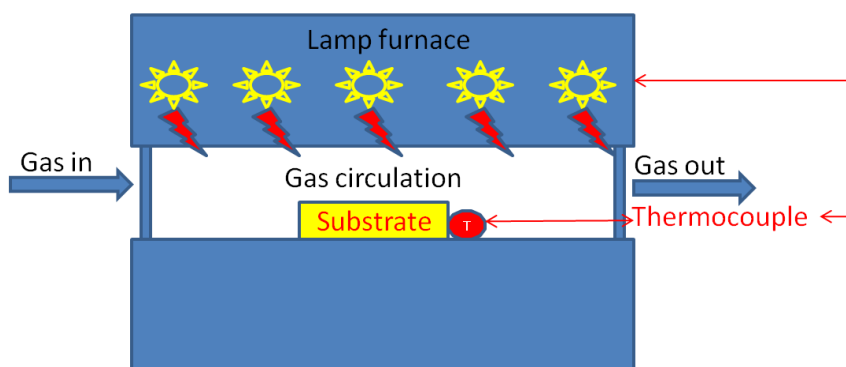

**Scheme S1.** Illustration of RTP. The material on a substrate is heated with an array of lamps under thermal control. Regulated inert gas flow leads to efficient mass transfer.

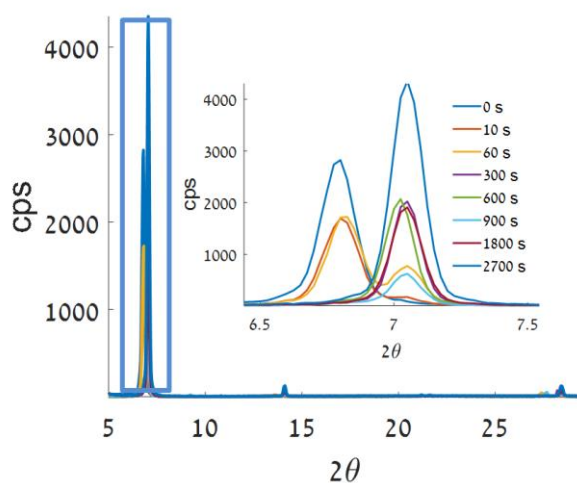

**Figure S1.** Powder X-ray diffractograms recorded from 70-nm CuPc nanocrystalline thin films PVD-deposited on a substrate at 110°C after RTP at 350 °C (CPS = counts per second) for 0, 10, 60, 300, 600, 900, 1800 and 2700 s. Inset shows magnified view of the outlined area. Different intensities were obtained because measurements were made for different thin films.

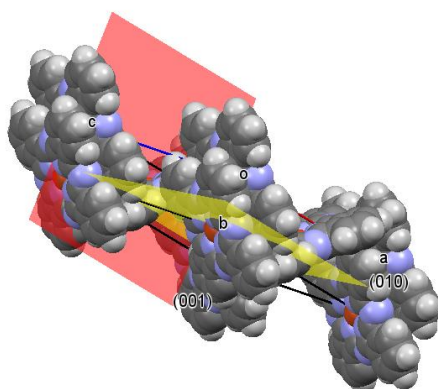

**Figure S2.** Crystal structure of the  $\beta$ -form CuPc. Yellow and red indicate (010) and (001) planes respectively.

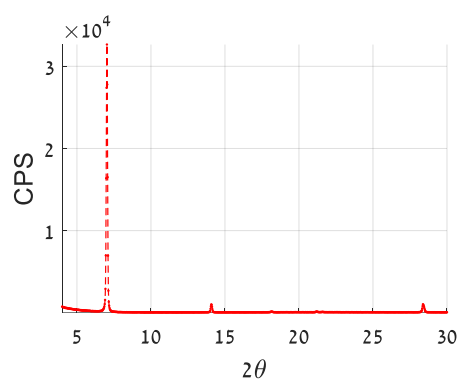

**Figure S3.** XRD showing preferred orientation of  $\beta$  form CuPc crystals obtained by RTP of 70-nm film deposited by PVD on a substrate heated at 110 °C (bottom-gate/top-contact device).

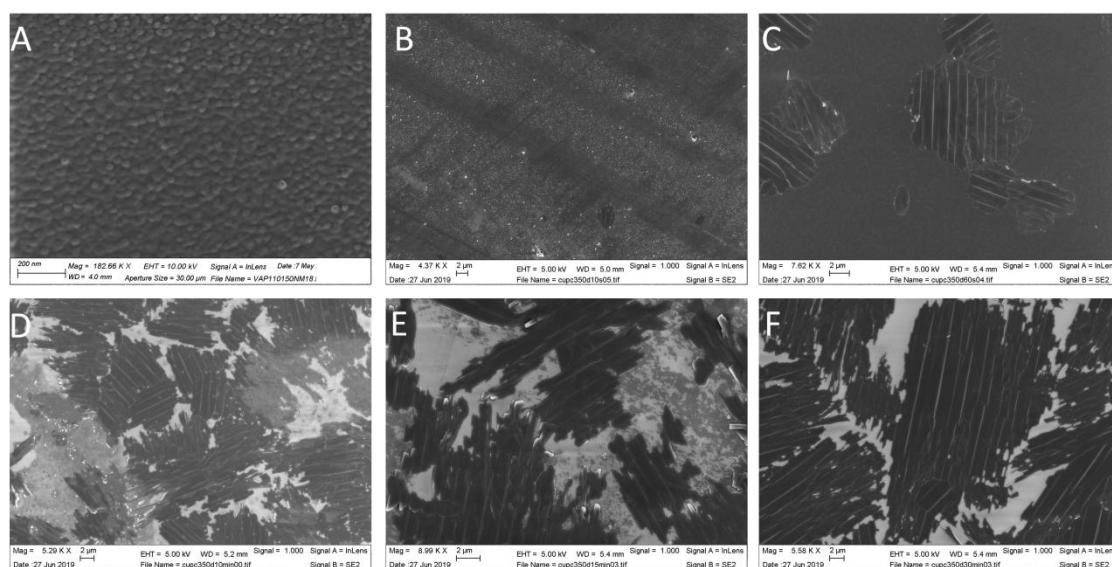

**Figure S4.** SEM images of 150-nm CuPc thin films deposited by PVD on the substrate heated at 110°C after RTP in argon flow (1000 sccm) at 350 °C: (A) 0 s, (B) 10 s, (C) 60 s, (D) 600 s, (E) 900 s, and (F) 1800 s.

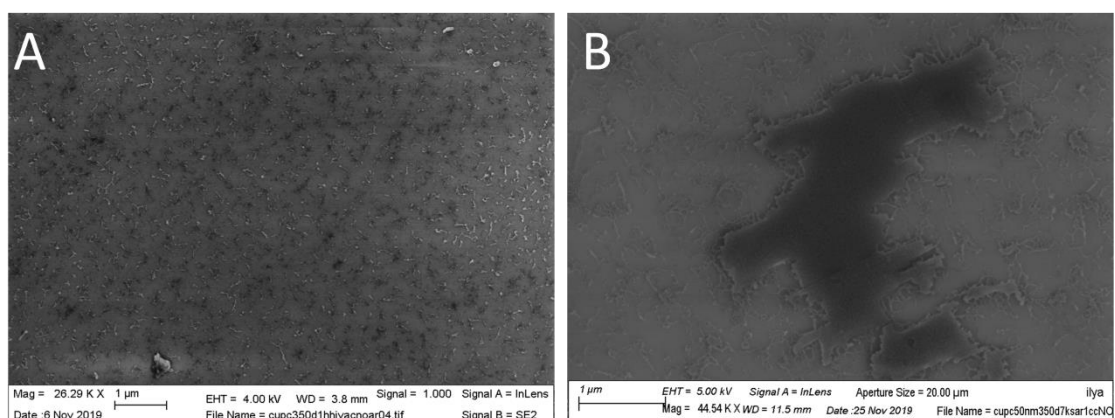

**Figure S5.** CuPc after RTP (2 h at 350 °C) of a 70-nm thick film deposited by PVD on a substrate heated to 110 °C: (A) without Ar flow, (B) under low argon flow (1 sccm).

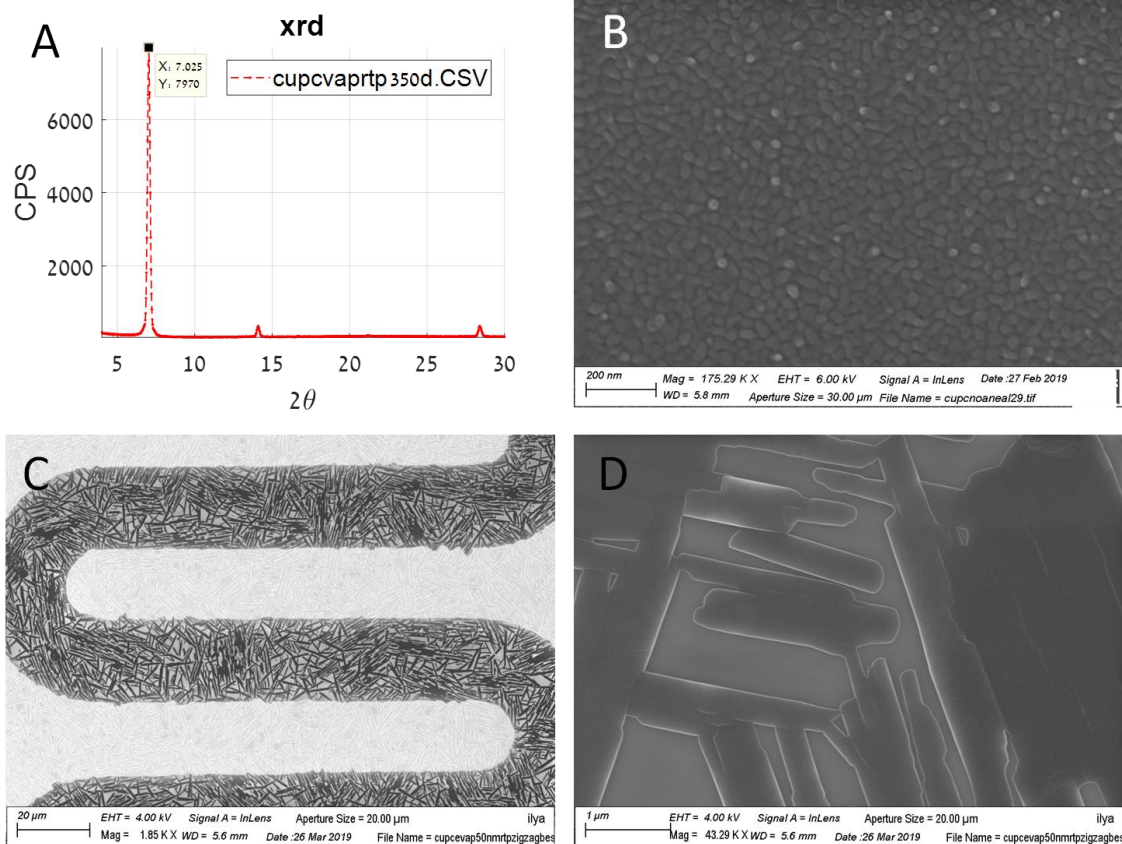

**Figure S6.**  $\beta$  form CuPc crystals obtained after RTP of 70-nm thick film deposited by PVD on a silicon substrate at 25 °C. (A) XRD of  $\beta$  form CuPc crystals obtained after RTP; (B) SEM images of 70-nm CuPc thin films deposited by PVD on a silicon substrate at 25 °C, before RTP; (C) crystals on silicon substrate after RTP treatment, covered with mask-made Au contacts; (D) crystals on silicon substrate, zoom in. A network of long and thin crystals was obtained.

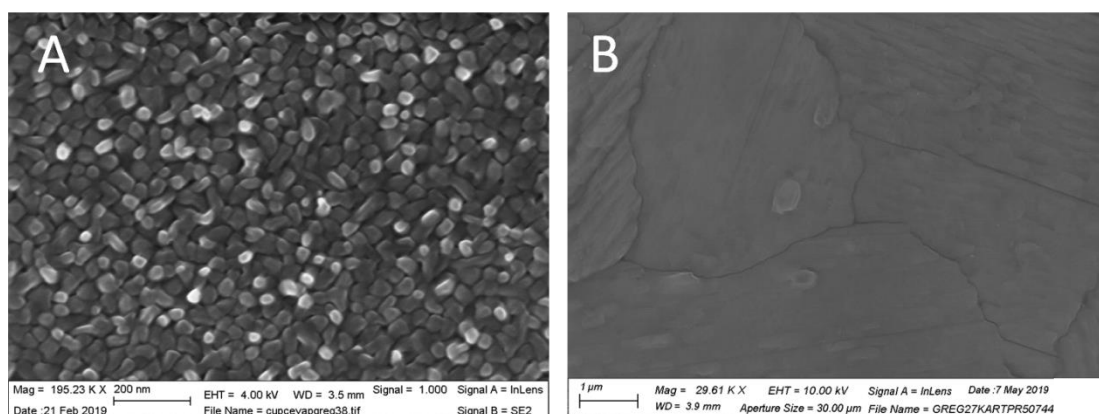

**Figure S7.** SEM images of 400-nm thick CuPc film deposited by PVD on a silicon substrate at 110 °C: (A) before and (B) after RTP (3 h, at 350 °C under Ar flow of 1000 sccm).

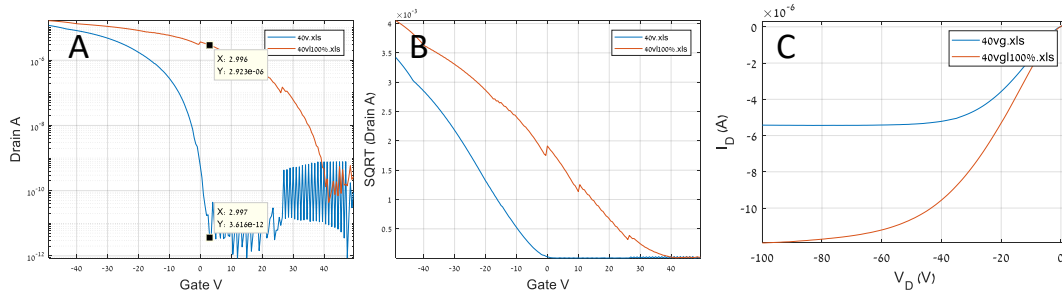

**Figure S8.** (A,B) transfer and (C) output characteristics of the of  $\beta$  form CuPc crystals obtained by RTP of 70-nm thick film deposited by PVD on a silicon substrate at 25 °C under white light illumination of 24 mW/cm<sup>2</sup> (red line) and in dark (blue line). Currents are presented at absolute value.

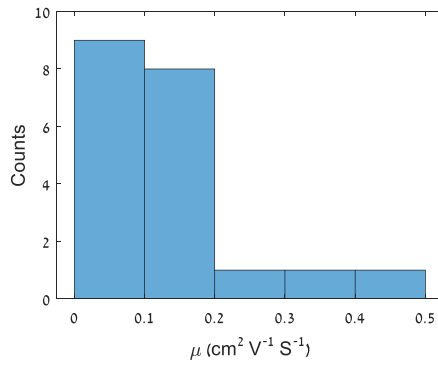

**Figure S9.** Histogram of the mobilities for  $\beta$  form CuPc crystals obtained by RTP of 70-nm thick film deposited by PVD on a silicon substrate at 110 °C.

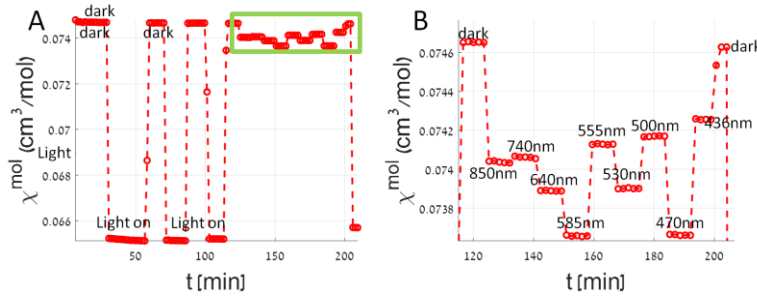

**Figure S10.** (A) Changes of magnetic susceptibility of  $\beta$ -form CuPc powder obtained RTP treatment under white light illumination of  $\approx 30 \text{ mW/cm}^2$  and with color filters of 850-436 nm at 5K under magnetic field  $H=1 \text{ kOe}$ . The light and wave length were switched manually during the measurement; (B) Magnified view of the marked area in (A).

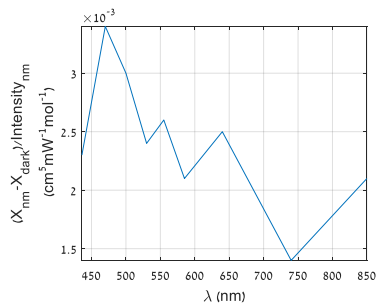

| $\lambda(\text{nm})$ | $X(\text{cm}^3/\text{mol})$ | Light intensity<br>(mW/cm <sup>2</sup> ) |
|----------------------|-----------------------------|------------------------------------------|
| dark                 | 0.0747                      | NA                                       |
| 850                  | 0.0740                      | 0.2895                                   |
| 740                  | 0.0741                      | 0.4317                                   |
| 640                  | 0.0739                      | 0.3047                                   |
| 585                  | 0.0737                      | 0.4825                                   |
| 555                  | 0.0741                      | 0.2031                                   |
| 530                  | 0.0739                      | 0.3149                                   |
| 500                  | 0.0742                      | 0.1625                                   |
| 470                  | 0.0737                      | 0.2946                                   |
| 436                  | 0.0743                      | 0.1727                                   |

**Figure S11.** Changes in normalized magnetic susceptibility of  $\beta$ -form CuPc powder obtained after RTP treatment, under white light illumination with color filters of 436-850 nm at 5K under magnetic field  $H=1$  kOe. The light intensity was measured for each color filter.

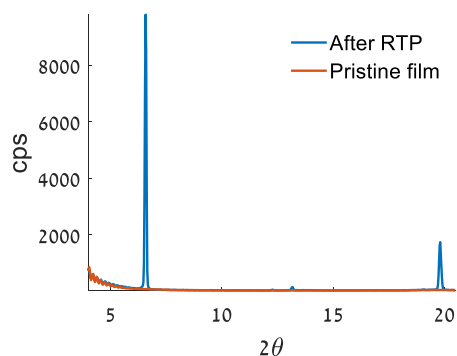

**Figure S12.** Powder X-ray diffractograms recorded from rubrene films deposited at 25 °C before and after RTP at 270 °C under Ar flow (1000 sccm). CPS = counts per second.

| <b>Film thickness(nm)</b> | <b>PVD deposition temperatures (°C )</b> | <b>Ar flow (sccm) at 350 °C for 3 h</b> | <b>Morphology</b>                                                   |
|---------------------------|------------------------------------------|-----------------------------------------|---------------------------------------------------------------------|
| 70                        | 110                                      | 1000                                    | Well-separated bundles of oriented ribbon-like microcrystal's       |
| 70                        | 25                                       | 1000                                    | Interconnected network of micro ribbon crystals 100-500 nm in width |
| 70                        | 110                                      | <1                                      | Crystalline structures unsuitable for device fabrication            |
| 100-200                   | 110                                      | 1000                                    | Isolated flat domains of interacting ribbons                        |
| 400                       | 110                                      | 1000                                    | Continuous crystalline domains                                      |

**Table S1.** Effect of PVD and RTP parameters on the CuPc morphology.
